# Supplementary material
Source: publisher figshare collection journal article supplement (https://rs.figshare.com/ndownloader/files/15288839)
Supplement: Supplementary file 1 [file 15288839]

**Supplementary File 2 for Lukas & Huchard: The evolution of infanticide by females in mammals (Phil Trans B, 2018)**

Credit for animal drawings used in Figure 1

All drawings were downloaded from PhyloPic: http://phylopic.org

Picture information is listed as:

Common name listed in figure (taxon identifier for picture on PhyloPic): Author

Starting from top, clockwise:

Old World primate (*Papio*): Uncredited

Hare (*Leporidae*): Sarah Werning

Squirrel (*Sciuridae*): Catherine Yasuda

Marmot (*Marmota monax*): Michael Keesey

Mice (*Muridae*): Madeleine Price Ball

Marsupial (*Marsupialia*): Sarah Werning

Bat (*Chiroptera*): Michael Keesey

Mongoose (*Herpestoidae*): Michael Keesey

Felids (*Panthera*): Sarah Werning

Canids (*Canidae*): Michael Keesey

Bear (*Ursus*): Steven Traver

Seal & sealions (*Pinnipedia*): Steven Traver

Marten (*Meles*): Uncredited

Ungulate (*Cervus*): Steven Traver

Lemur (*Daubentonia*): Uncredited

Great ape (*Gorilla*): Michael Keesey

New World primate (*Cebus*): Sarah Werning
